# Supplementary material for: Novel biocompatible chitosan decorated single-walled carbon nanotubes (SWNTs) for biomedical applications: theoretical and experimental investigations
Source: Royal Society of Chemistry journal article supplement (doi:10.1039/c003767b), 2010-01-01
Supplement: c003767b.pdf [file c003767b.pdf]

# Novel biocompatible chitosan decorated single-walled carbon nanotubes (SWNTs) for biomedical applications: theoretical and experimental investigations

Sara Piovesan, Paul A. Cox, James R. Smith, Dimitrios G. Fatouros, and Marta Roldo

## Cytotoxicity assay method

Caco-2 cells were seeded in 96-well plate and incubated for 2 days in culture medium (Media 199, Invitrogen, supplemented with FCS (10 %) and penicillin / streptomycin (50 µg/mL) at 37 °C in air (95 %) : CO<sub>2</sub> (5 %). Media was removed and cells were incubated for 2 h with polymer (500 µL) dissolved in Media 199, at concentrations of 0.1, 1 and 10 mg/mL. SDS (10 mg/mL) was used as positive control and culture media as reference for 100% cell viability. Media and test solutions were then removed after treatment time and cells washed with PBS. Freshly prepared MTT (200 µL) in Media 199 (0.5 mg/mL), without any additions, was added and cells were incubated for 1 h at 37 °C. Subsequently, MTT solutions were removed from the wells and DMSO (400 µL) was added to dissolve formed formazan crystals. After homogeneous agitation (10 min), the absorbance was read at 584 nm.

**Table A** NMR spectra analysis for NBSC, NPSC.

| NBSC                 |                                                                    | NPSC                 |                                                                                       |
|----------------------|--------------------------------------------------------------------|----------------------|---------------------------------------------------------------------------------------|
| Chemical shift / ppm | Assignment                                                         | Chemical shift / ppm | Assignment                                                                            |
| 0.9 - 1.1            | -NHCH <sub>2</sub> (CH <sub>2</sub> ) <sub>2</sub> CH <sub>3</sub> | 1.1                  | -NHCOCH <sub>2</sub> CH <sub>2</sub> (CH <sub>2</sub> ) <sub>12</sub> CH <sub>3</sub> |
| 1.3 - 1.5            | -NHCH <sub>2</sub> (CH <sub>2</sub> ) <sub>2</sub> CH <sub>3</sub> | 1.2 - 1.3            | -NHCOCH <sub>2</sub> CH <sub>2</sub> (CH <sub>2</sub> ) <sub>12</sub> CH <sub>3</sub> |
| 1.5 - 1.8            |                                                                    | 1.2 - 1.4            | -NHCOCH <sub>2</sub> CH <sub>2</sub> (CH <sub>2</sub> ) <sub>12</sub> CH <sub>3</sub> |
| 2.0 - 2.2            | -NH-CO-CH <sub>3</sub>                                             | 2.0 - 2.1            | -NH-CO-CH <sub>3</sub>                                                                |
|                      |                                                                    | 2.5                  | -NHCOCH <sub>2</sub> CH <sub>2</sub> (CH <sub>2</sub> ) <sub>12</sub> CH <sub>3</sub> |
| 2.9 - 3.4            | 2H in C2                                                           | 3.0 - 3.1            | 2H in C2                                                                              |
| 3.7 - 3.8            | -NHCH <sub>2</sub> (CH <sub>2</sub> ) <sub>2</sub> CH <sub>3</sub> |                      |                                                                                       |
| 3.6 - 3.9            | 2H in substituted C6                                               | 3.6 - 3.7            | 2H in substituted C6<br>(overlapping with next peak)                                  |
| 3.9 - 4.1            |                                                                    |                      |                                                                                       |
| 4.1 - 5.1            | HOD and all other H                                                | 4.3 - 4.6            | HOD and all other H                                                                   |
| 5.1 - 5.2            | 1H in C1                                                           | 4.8 - 4.9            | 1H in C1                                                                              |
|                      |                                                                    | 8.4                  | -NHCO-                                                                                |

Tukey Kramer: \*\*p < 0.01; \*\*\*p < 0.001 compared to NOSC

## Characterisation of chitosan derivatives

### i) FT-IR results

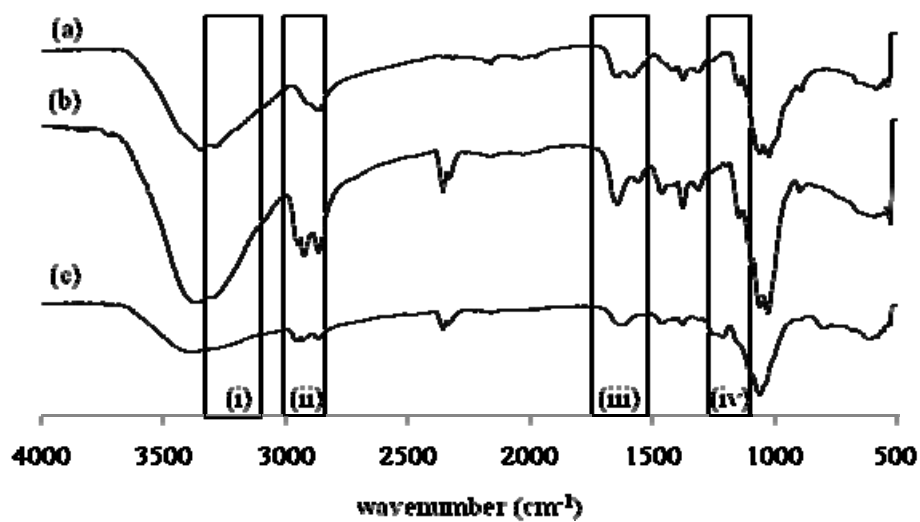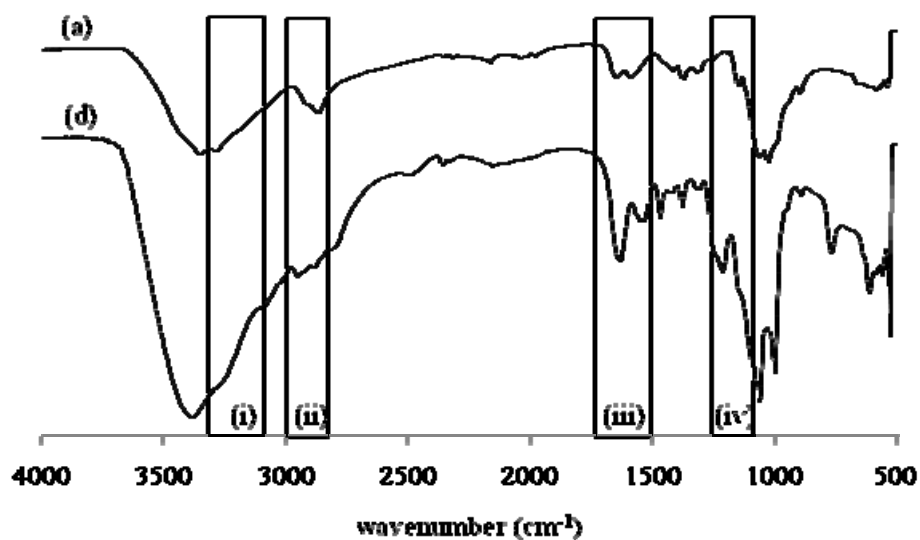

Fig. A ATR spectra of (a) chitosan, (b) *N*-butyl chitosan, (c) *N*-butyl-*O*-sulphate chitosan and (d) *N*-palmitoyl-*O*-sulphate chitosan.

ii) X-RD analysis

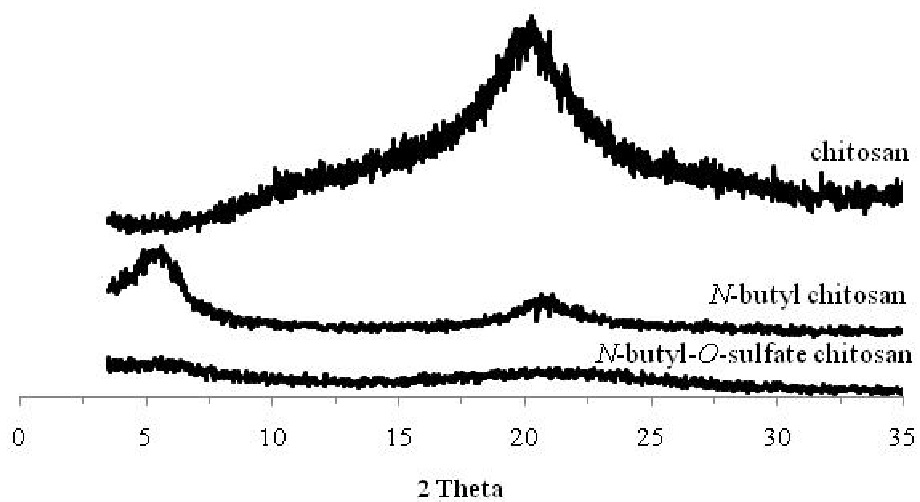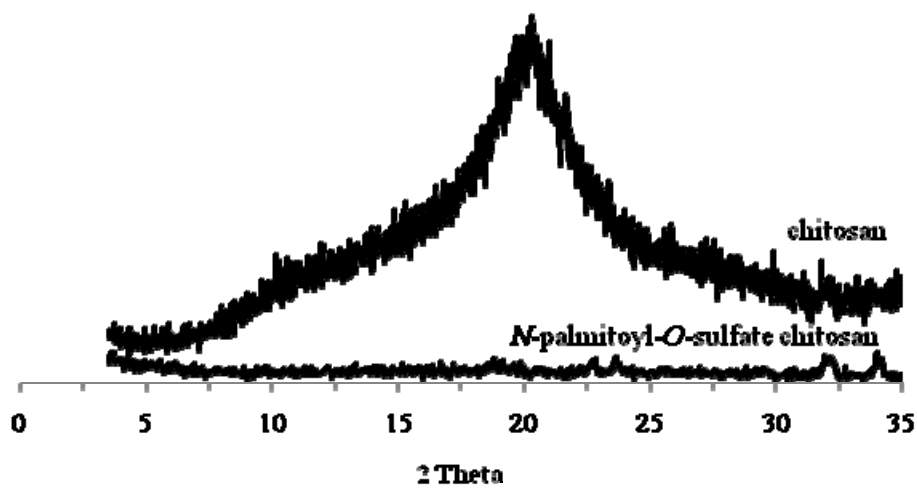

Fig B XRD patterns of chitosan and its derivatives.

## Atomic Force Microscopy (AFM) studies

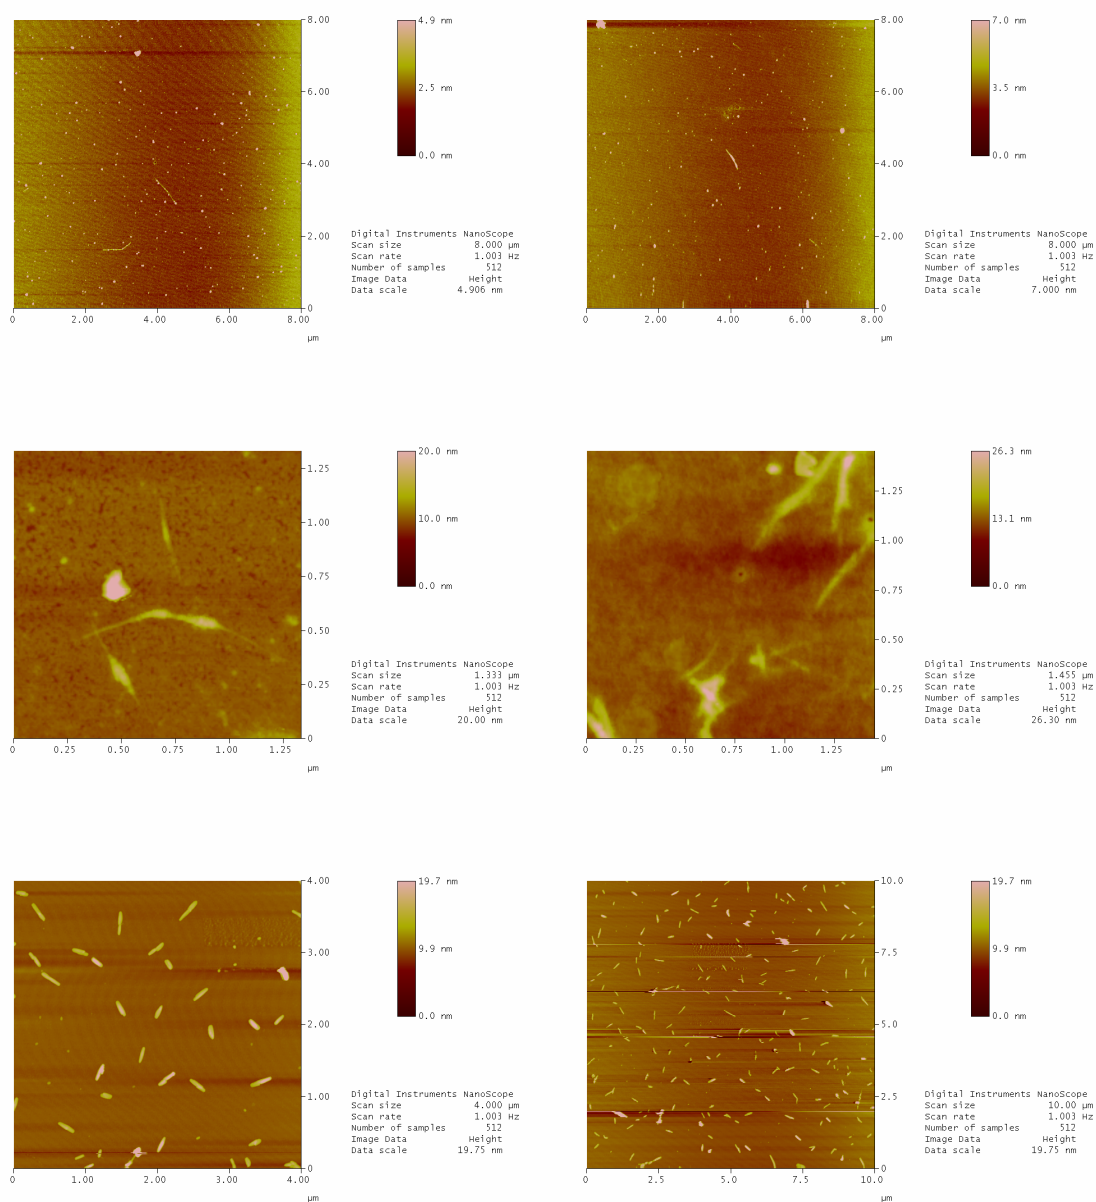

**Fig. C** AFM topography images of SWNTs coated with NBSC (top panels), NOSC (middle panels) and NPSC (bottom panels).
